# Supplementary material for: Direct synthesis via RAFT of amphiphilic diblock polyelectrolytes facilitated by the use of a polymerizable ionic liquid as a monomer
Source: Royal Society of Chemistry journal article supplement (doi:10.1039/d1py00801c), 2021-01-01
Supplement: d1py00801c1.pdf [file d1py00801c1.pdf]

# Direct synthesis via RAFT of amphiphilic diblock polyelectrolytes facilitated by the use of a polymerizable ionic liquid as monomer

Aleksander Guzik, Patrizio Raffa\*

Department of Chemical Engineering - Product Technology, ENTEG Institute, Faculty of Science and Engineering, University of Groningen, Nijenborgh 4, 9747 AG Groningen, The Netherlands

DPI, P.O. Box 902, 5600 AX Eindhoven, the Netherlands.

\* corresponding author: p.raffa@rug.nl

## Supporting Information

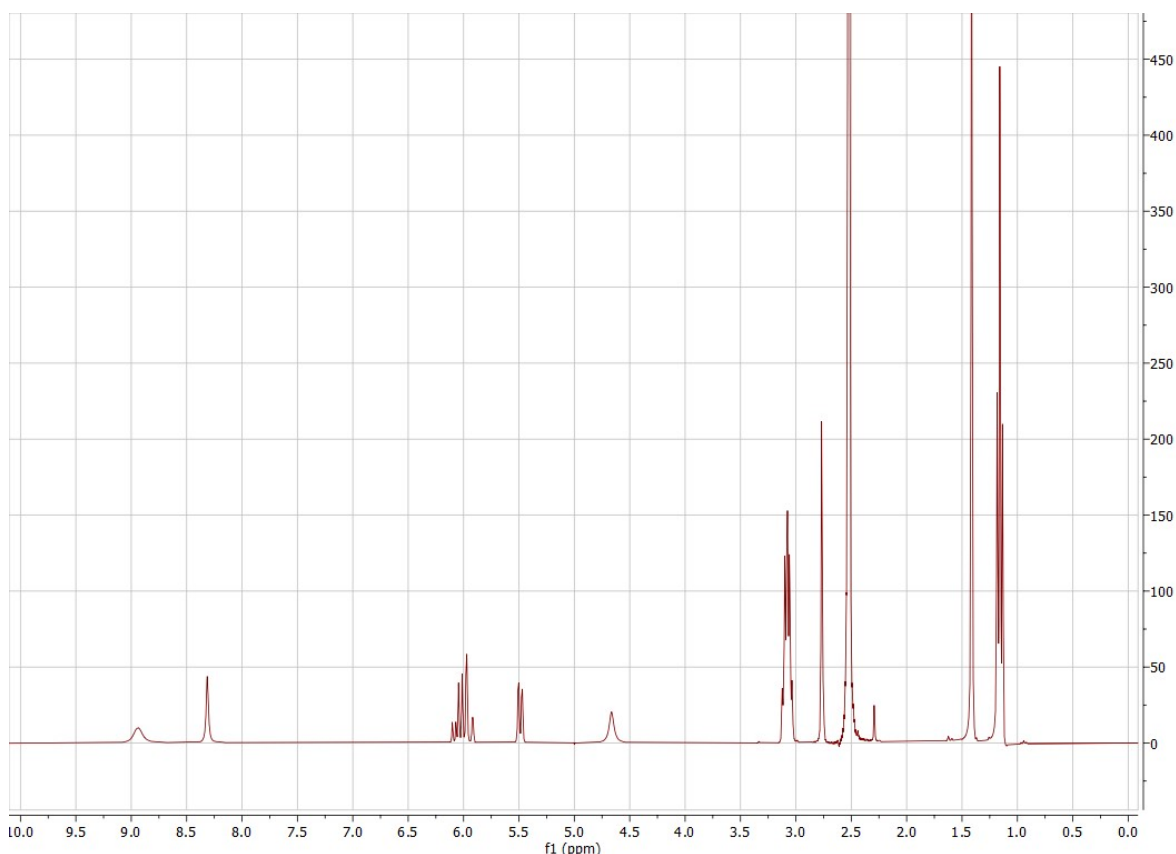

**Figure S1.** <sup>1</sup>H NMR spectrum (recorded in d<sub>6</sub>-DMSO) of a DMSO solution of the Et<sub>3</sub>N-AMPS polymerizable ionic liquid monomer.

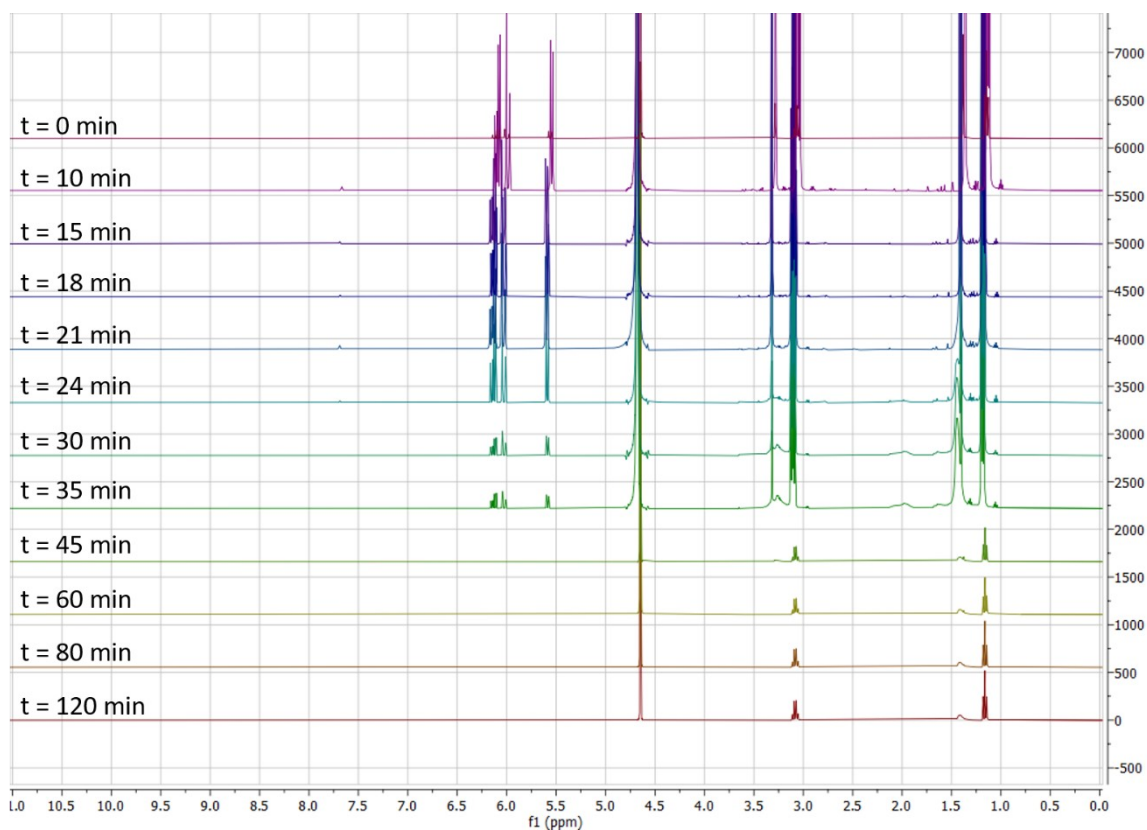

**Figure S2.** <sup>1</sup>H NMR spectra of Et<sub>3</sub>N-AMPS RAFT polymerization mixture at various time points. The spectra were used to calculate monomer conversions reported in Figure 1A.

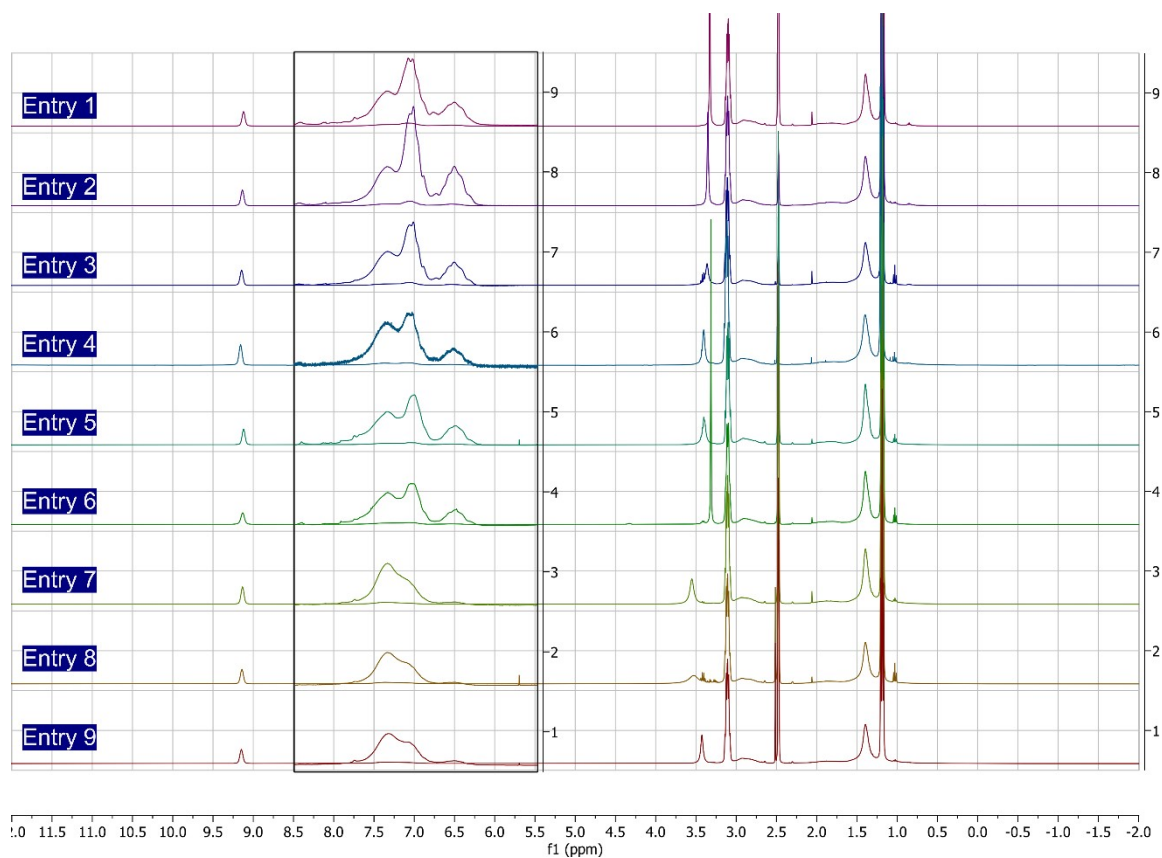

**Figure S3.**  $^1\text{H}$  NMR spectra of poly( $\text{Et}_3\text{N-AMPS}$ )-*block*-polystyrene copolymers from Table 2, recorded in  $\text{d}_6$ -DMSO. The inset shows a close-up of the 8.5 – 5.5 ppm range.

**Table S1.** Results of elemental analysis on the sample in Table 2 entry 9.

|             | nitrogen wt % | carbon wt % | hydrogen wt % | sulfur wt % |
|-------------|---------------|-------------|---------------|-------------|
| homopolymer | 5.37          | 32.55       | 6.04          | 12.03       |
| diblock     | 5.22          | 34.08       | 6.065         | 13.56       |

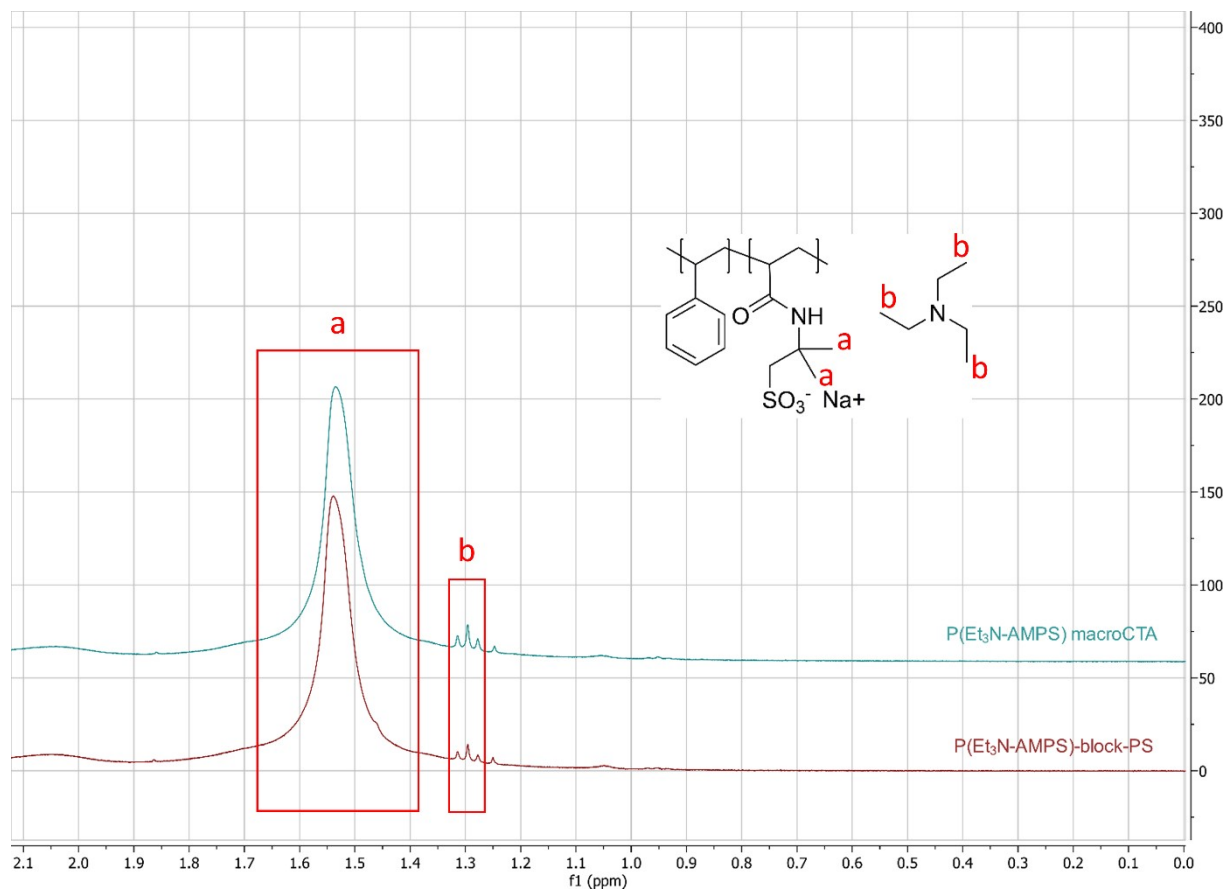

**Figure S4.** NMR spectra (in  $\text{D}_2\text{O}$ ) of the macroCTA and diblock sample from Table 2 entry 9 after treatment with NaOH. The residual peak of  $\text{Et}_3\text{N}$  (b) from both polymer samples integrates for less than 1 % of peak (a) .

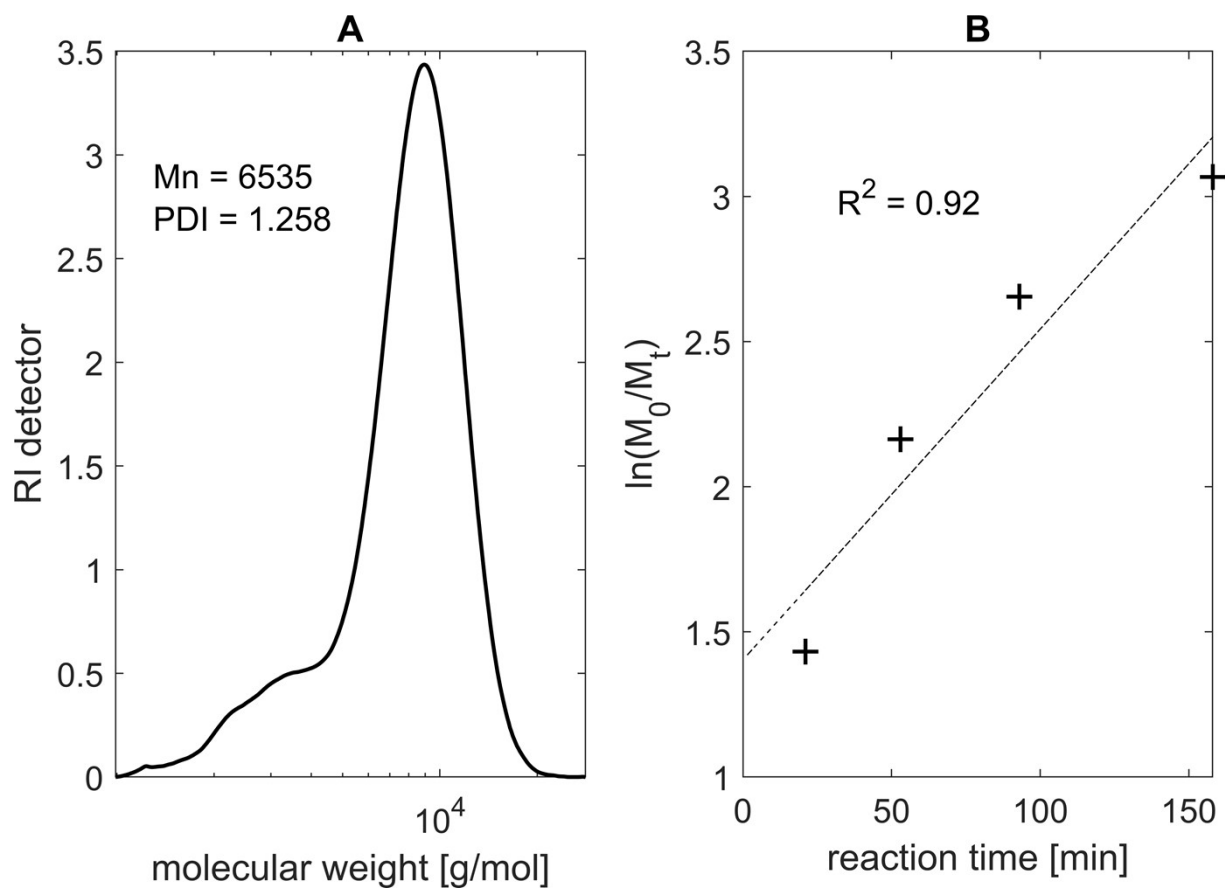

**Figure S5.** Investigation of the Et<sub>3</sub>N-AMPS RAFT homopolymerization conducted in ethanol. **A** – aqueous SEC trace of the product after purification by precipitation, **B** – NMR kinetic study of the polymerization showing pseudo-1<sup>st</sup> order behavior

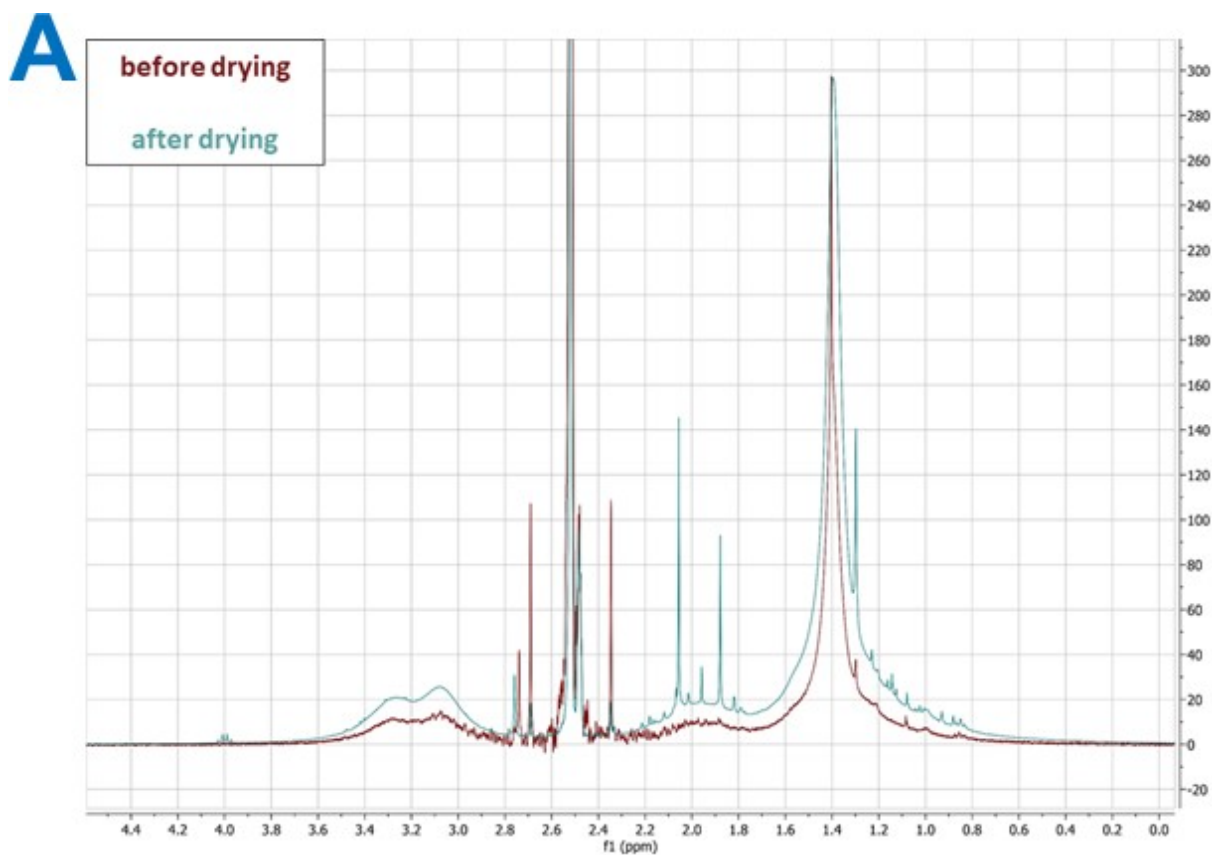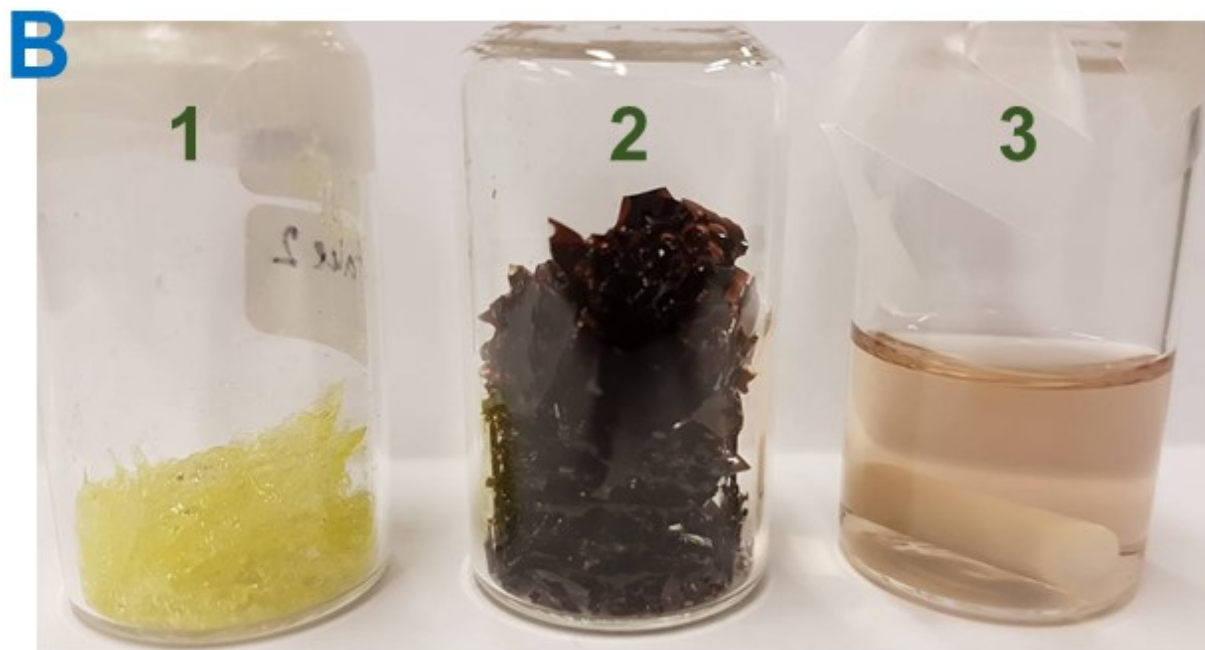

**Figure S6. A:** comparison of NMR spectra of the product of polymerization of non-neutralized H-AMPS in DMSO before and after oven drying at 80 °C. The appearance of new peaks after drying may be a sign of decomposition **B:** Appearance of PAMPS-RAFT macroCTA synthesized by the method involving Et<sub>3</sub>N (**B1**), and by polymerizing H-AMPS acid in DMSO (**B2**). The change in color from yellow to dark red/brown was a consequence of drying the polymer in an oven. Et<sub>3</sub>N-AMPS polymer was processed in the same way and did not change its appearance. The discolored product is soluble in water (**B3**), the solution being characterized by a foul smell.

**Table S2.** Measured DLS values for all samples in Table 2 and Figure 5

| Sample  |                      | Number-average diameter [nm] |          | Z-average diameter [nm] |          | polydispersity index |          |
|---------|----------------------|------------------------------|----------|-------------------------|----------|----------------------|----------|
|         |                      | value                        | std. dev | value                   | std. dev | value                | std. dev |
| Entry 1 | macroCTA             | -                            | -        | -                       | -        | -                    | -        |
|         | diblock in MilliQ    | 14.640                       | 0.651    | 30.840                  | 8.156    | 0.361                | 0.105    |
|         | diblock in 0.5M NaCl | 15.370                       | 0.727    | 22.900                  | 0.514    | 0.201                | 0.059    |
| Entry 2 | macroCTA             | -                            | -        | -                       | -        | -                    | -        |
|         | diblock in MilliQ    | 26.360                       | 1.375    | 51.630                  | 2.032    | 0.409                | 0.036    |
|         | diblock in 0.5M NaCl | 23.110                       | 1.634    | 41.610                  | 2.941    | 0.300                | 0.036    |
| Entry 3 | macroCTA             | -                            | -        | -                       | -        | -                    | -        |
|         | diblock in MilliQ    | 35.570                       | 2.756    | 65.850                  | 0.520    | 0.218                | 0.011    |
|         | diblock in 0.5M NaCl | 29.140                       | 1.610    | 49.240                  | 0.288    | 0.148                | 0.010    |
| Entry 4 | macroCTA             | -                            | -        | -                       | -        | -                    | -        |
|         | diblock in MilliQ    | 60.260                       | 7.401    | 117.600                 | 2.202    | 0.264                | 0.024    |
|         | diblock in 0.5M NaCl | 34.120                       | 1.552    | 58.360                  | 0.658    | 0.179                | 0.010    |
| Entry 5 | macroCTA             | 0.804                        | 0.056    | 307.300                 | 157.300  | 0.414                | 0.077    |
|         | diblock in MilliQ    | 39.170                       | 1.118    | 58.160                  | 0.769    | 0.108                | 0.014    |
|         | diblock in 0.5M NaCl | 30.400                       | 2.497    | 47.550                  | 0.612    | 0.142                | 0.032    |
| Entry 6 | macroCTA             | 1.153                        | 0.605    | 984.500                 | 492.700  | 0.731                | 0.260    |
|         | diblock in MilliQ    | 32.150                       | 1.860    | 49.510                  | 0.835    | 0.115                | 0.013    |
|         | diblock in 0.5M NaCl | 22.080                       | 1.603    | 37.710                  | 0.612    | 0.171                | 0.010    |
| Entry 7 | macroCTA             | 0.833                        | 0.027    | 338.000                 | 127.900  | 0.421                | 0.088    |
|         | diblock in MilliQ    | 57.770                       | 1.880    | 94.13                   | 2.415    | 0.2942               | 0.047    |
|         | diblock in 0.5M NaCl | 6.004                        | 0.738    | 35.380                  | 1.287    | 0.476                | 0.070    |
| Entry 8 | macroCTA             | 0.806                        | 0.033    | 41.950                  | 47.470   | 0.299                | 0.129    |
|         | diblock in MilliQ    | 114.400                      | 8.179    | 155.700                 | 0.535    | 0.144                | 0.015    |
|         | diblock in 0.5M NaCl | 20.050                       | 13.370   | 67.990                  | 2.911    | 0.433                | 0.031    |
| Entry 9 | macroCTA             | 0.909                        | 0.071    | 355.300                 | 140.800  | 0.610                | 0.198    |
|         | diblock in MilliQ    | 226.600                      | 25.190   | 386.100                 | 7.676    | 0.311                | 0.027    |
|         | diblock in 0.5M NaCl | 46.830                       | 7.256    | 107.300                 | 2.242    | 0.398                | 0.014    |

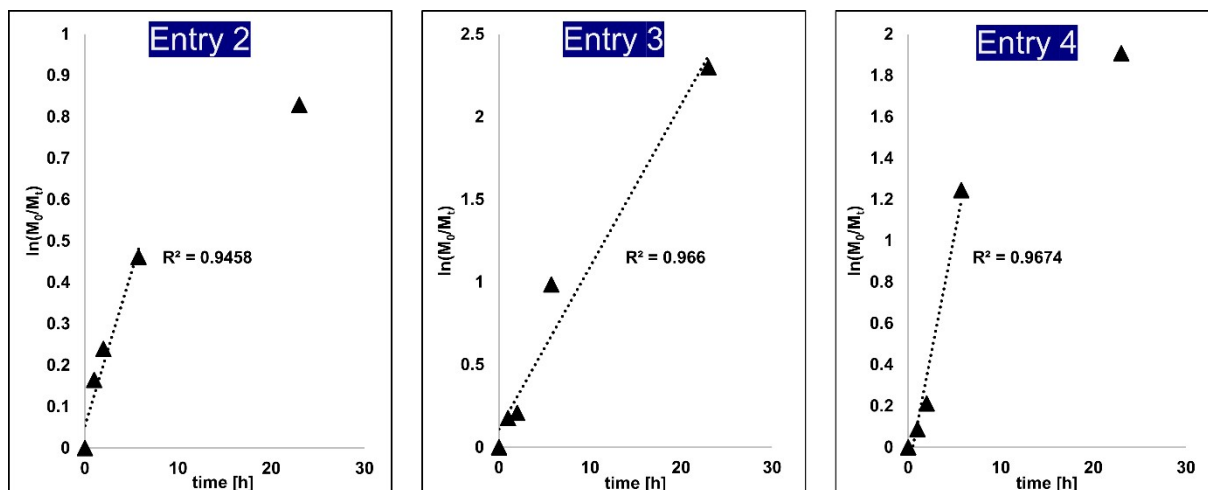

Figure S7. Kinetic plots measured with  $^1\text{H}$  NMR for “PS-first” reactions in Table 2 Entry 2,3,4

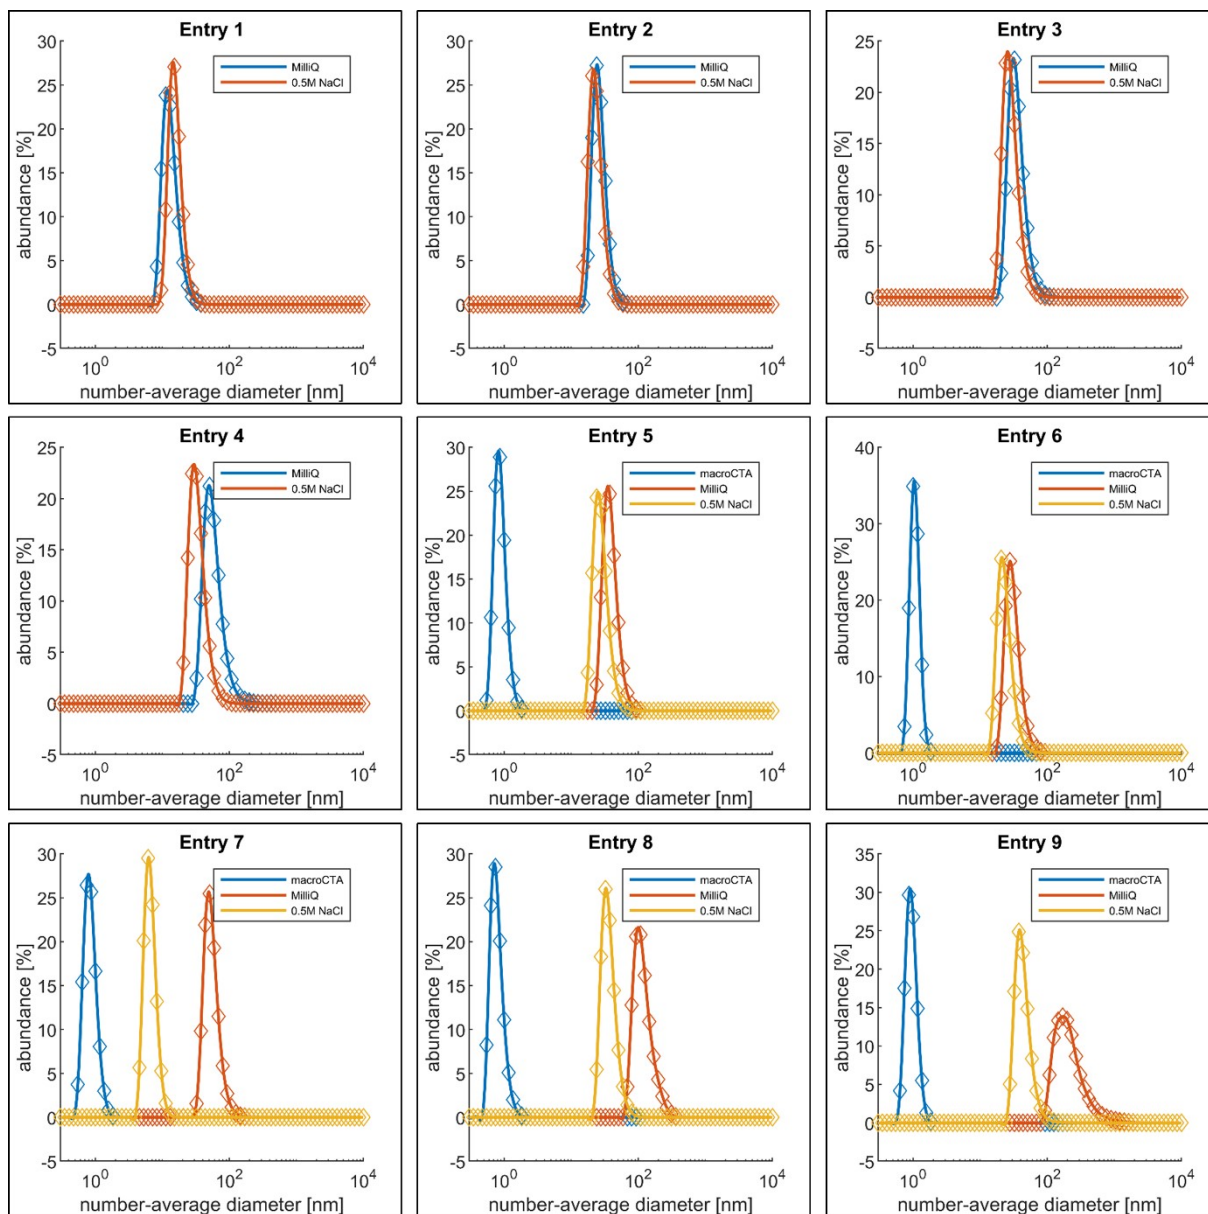



**Figure S8.** DLS number distributions of hydrodynamic diameter for each sample presented on the bargraph in Figure 5.

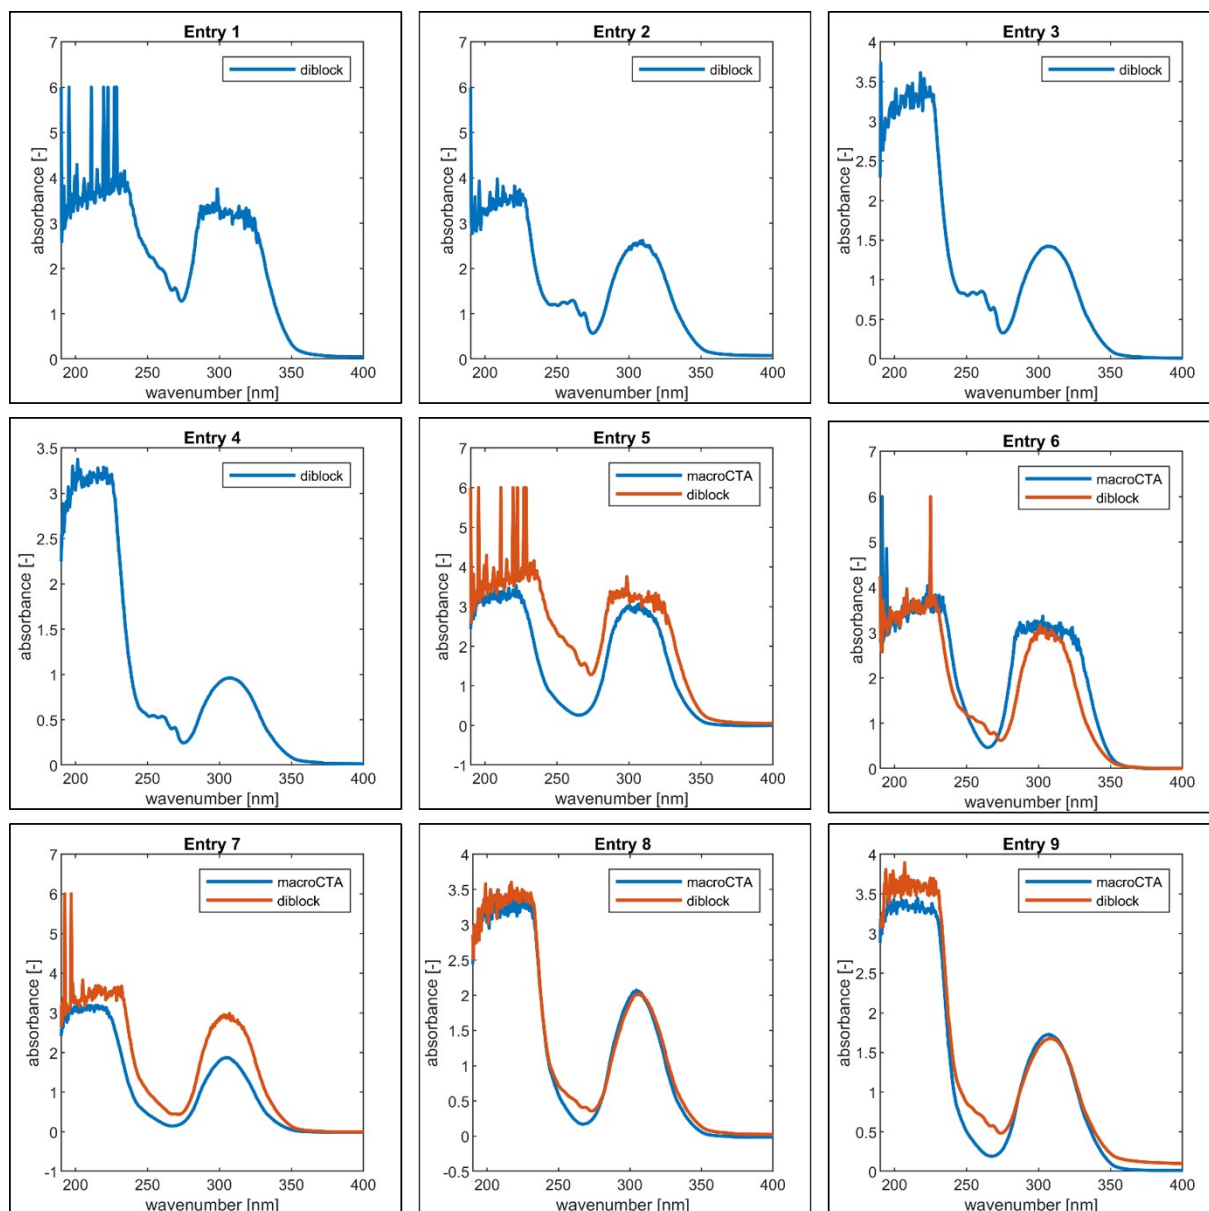

**Figure S9.** UV-VIS spectra recorded in water for all samples in Table 2 and for their corresponding macroCTAs (where applicable)



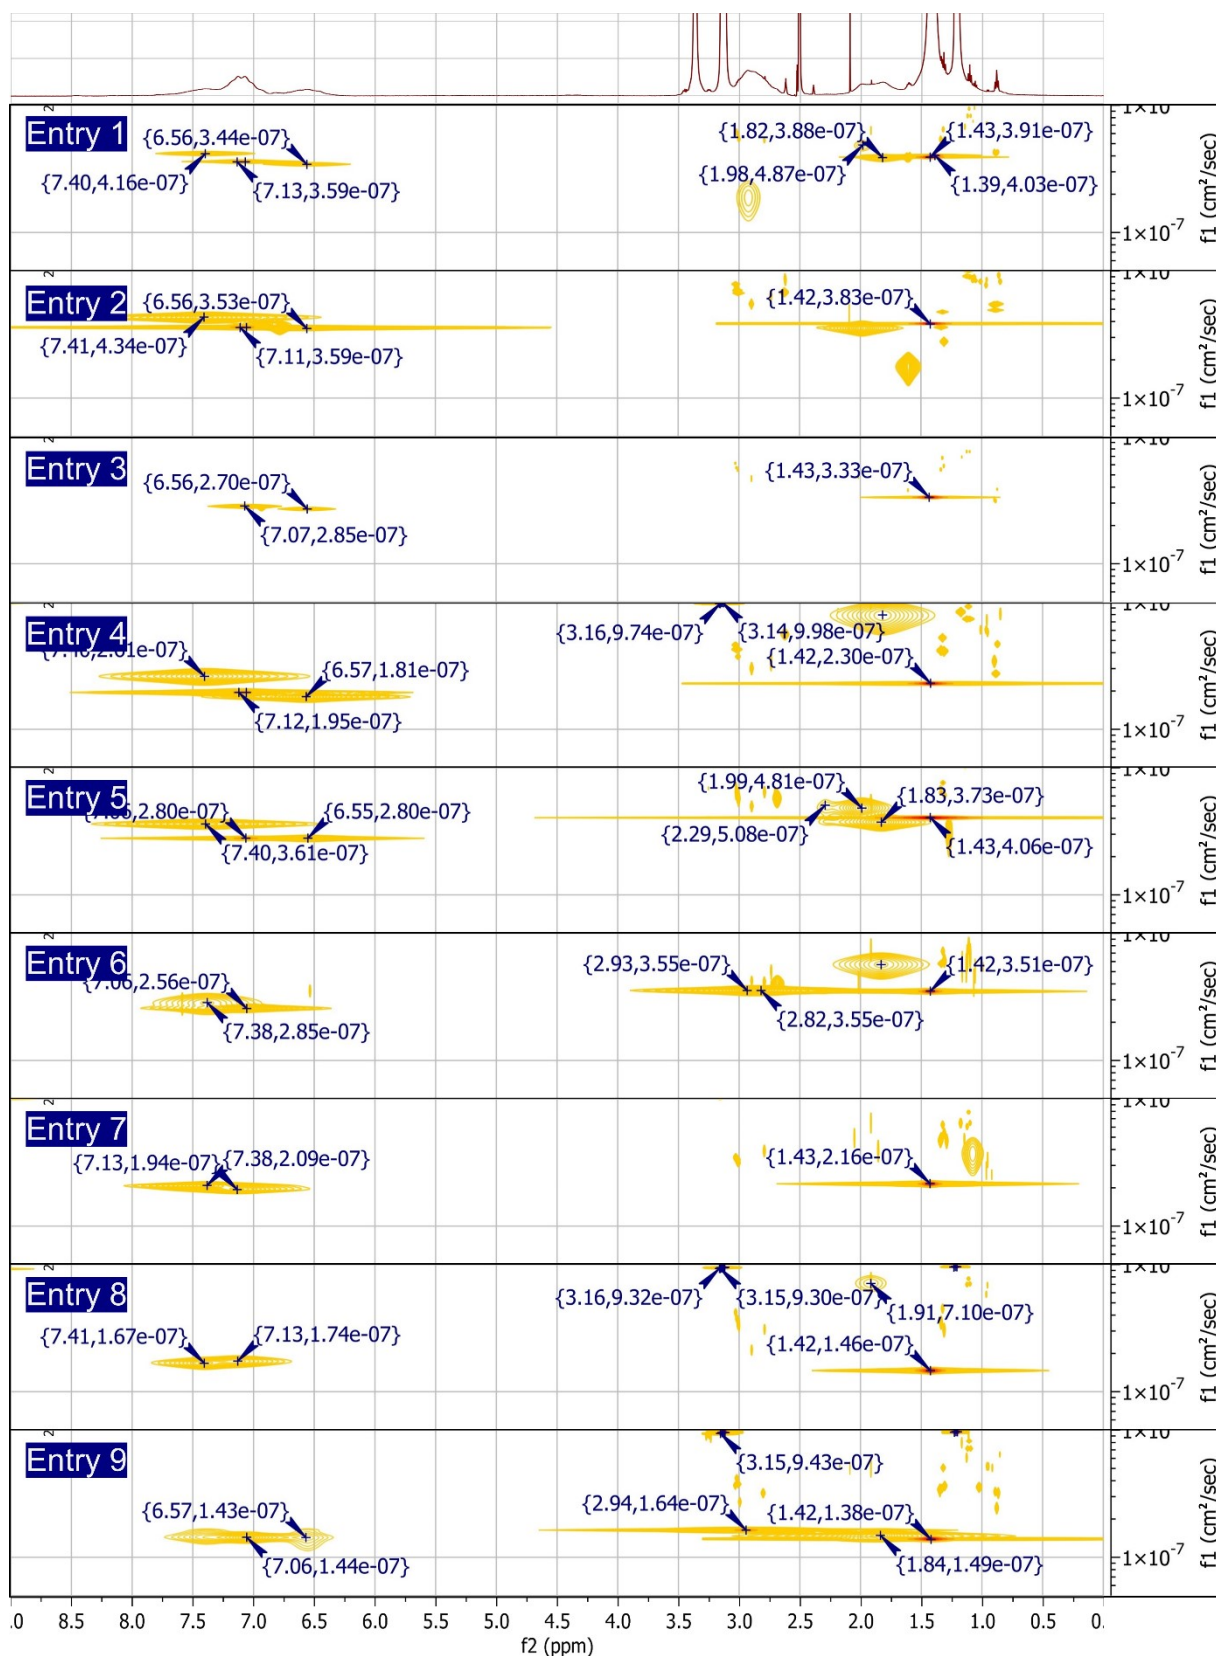

**Figure S10.** DOSY-NMR spectra recorded in d6-DMSO for all diblock samples in Table 2. The <sup>1</sup>H-NMR spectrum at the top belongs to the sample in Entry 1, but is representative of all the samples (also see Figure S3).

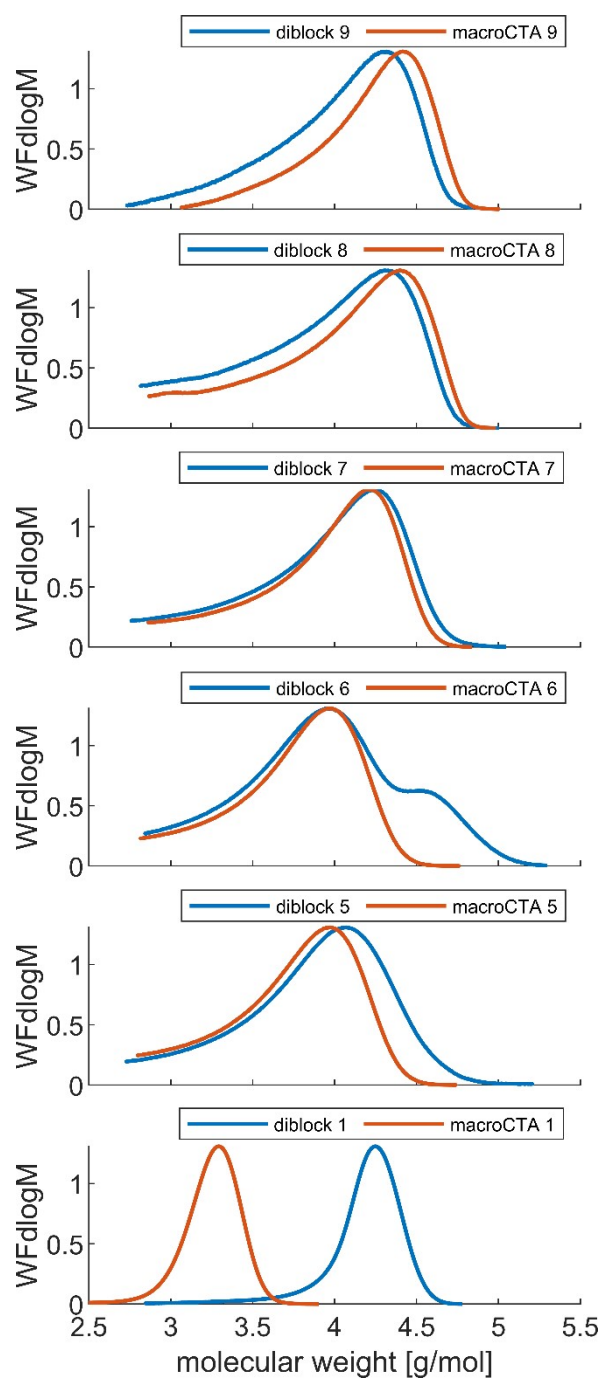

**Figure S11.** DMF SEC traces for diblock samples from Table 2 and their corresponding macroCTAs. The results have been recorded using a different SEC apparatus than that used in Figure 3.

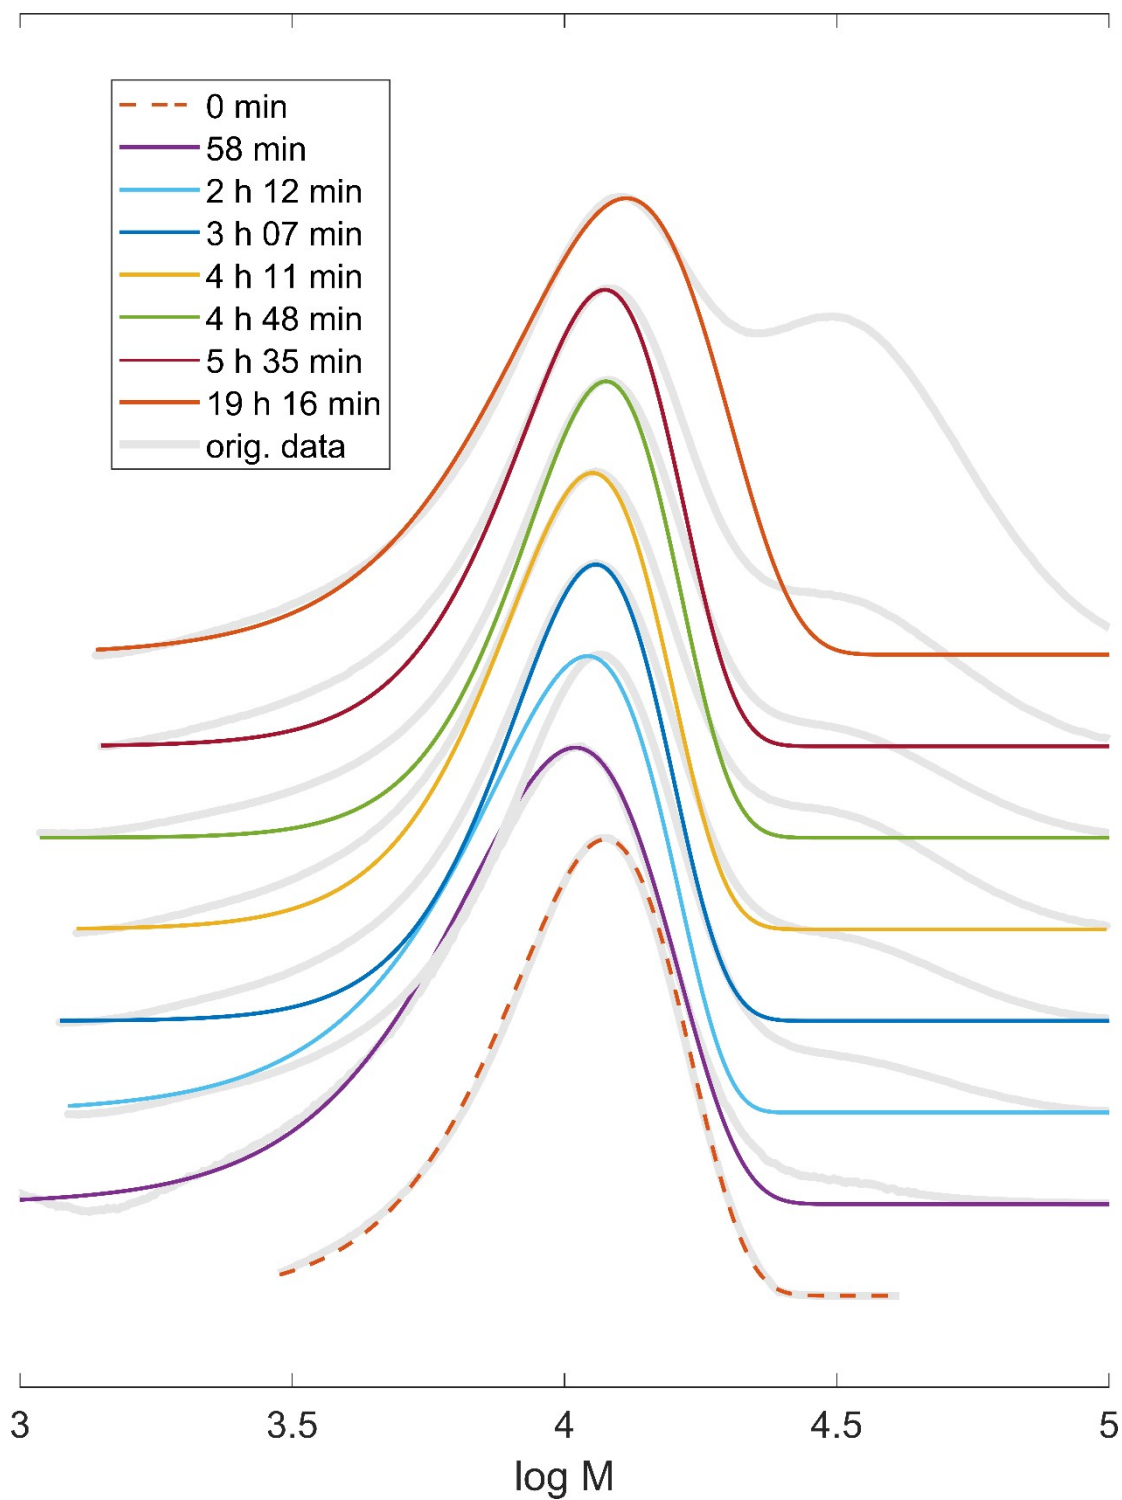

**Figure S12.** DMF SEC traces recorded for polymerization of styrene in the presence of  $(\text{Et}_3\text{N-AMPS})_{50}\text{-BDMAT}$  macroCTA. Parameters of the reaction:  $[\text{M}]/[\text{CTA}] = 200$ ,  $[\text{CTA}]/[\text{I}] = 10$ ,  $[\text{M}]/[\text{I}] = 2000$ ,  $[\text{M}]_0 = 1 \text{ mol/dm}^3$ , solvent: DMF, temperature:  $70 \text{ }^\circ\text{C}$ . Coloured traces are lognormal distributions fitted to the original data.
